# Supplementary material for: Characterization of pulmonary immune responses to hyperoxia by high-dimensional mass cytometry analyses
Source: PubMed Central journal article supplement (PMC7070092; doi:10.1038/s41598-020-61489-y), 2020-03-13
Supplement: 41598_2020_61489_MOESM1_ESM.pdf [file 41598_2020_61489_MOESM1_ESM.pdf]

Characterization of pulmonary immune responses to hyperoxia  
by high-dimensional mass cytometry analyses

Hanidziar D,<sup>1,5\*</sup> Nakahori Y,<sup>2,5</sup> Cahill LA,<sup>2</sup> Gallo D,<sup>3</sup> Keegan J,<sup>2</sup> Nguyen JP,<sup>2</sup>

Otterbein LE,<sup>3</sup> Lederer JA,<sup>2,6</sup> & Robson SC<sup>4,6</sup>

<sup>1</sup>Department of Anesthesia, Critical Care and Pain Medicine, Massachusetts  
General Hospital, Boston, MA 02114

<sup>2</sup>Department of Surgery, Brigham and Women's Hospital, Boston, MA 02115

<sup>3</sup>Department of Surgery, Beth Israel Deaconess Medical Center, Boston, MA 02115

<sup>4</sup>Departments of Anesthesia and Medicine, Beth Israel Deaconess Medical Center,  
Boston, MA 02115

<sup>5</sup>these authors contributed equally

<sup>6</sup>senior authors

**Figure S1**

**NORMOXIA**

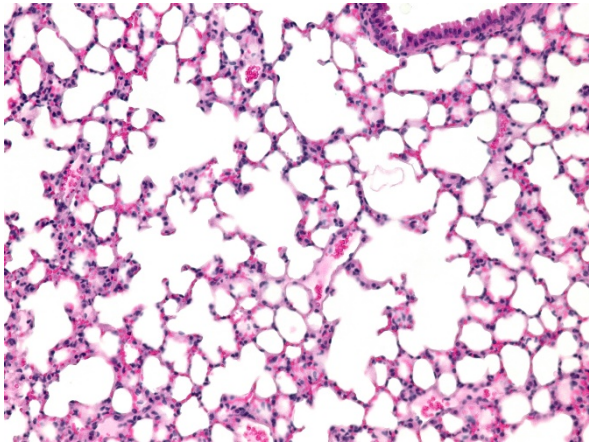

**HYPEROXIA**

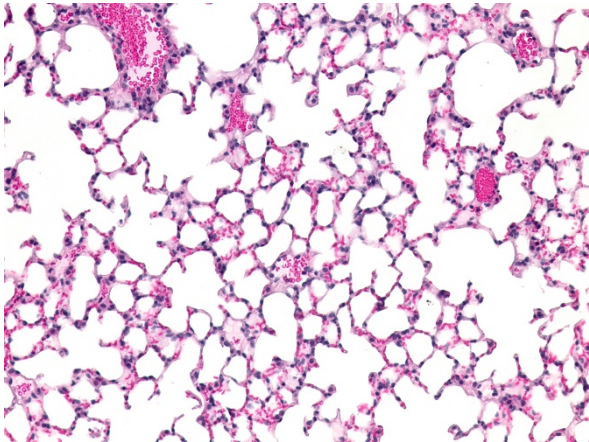

**Figure S2**

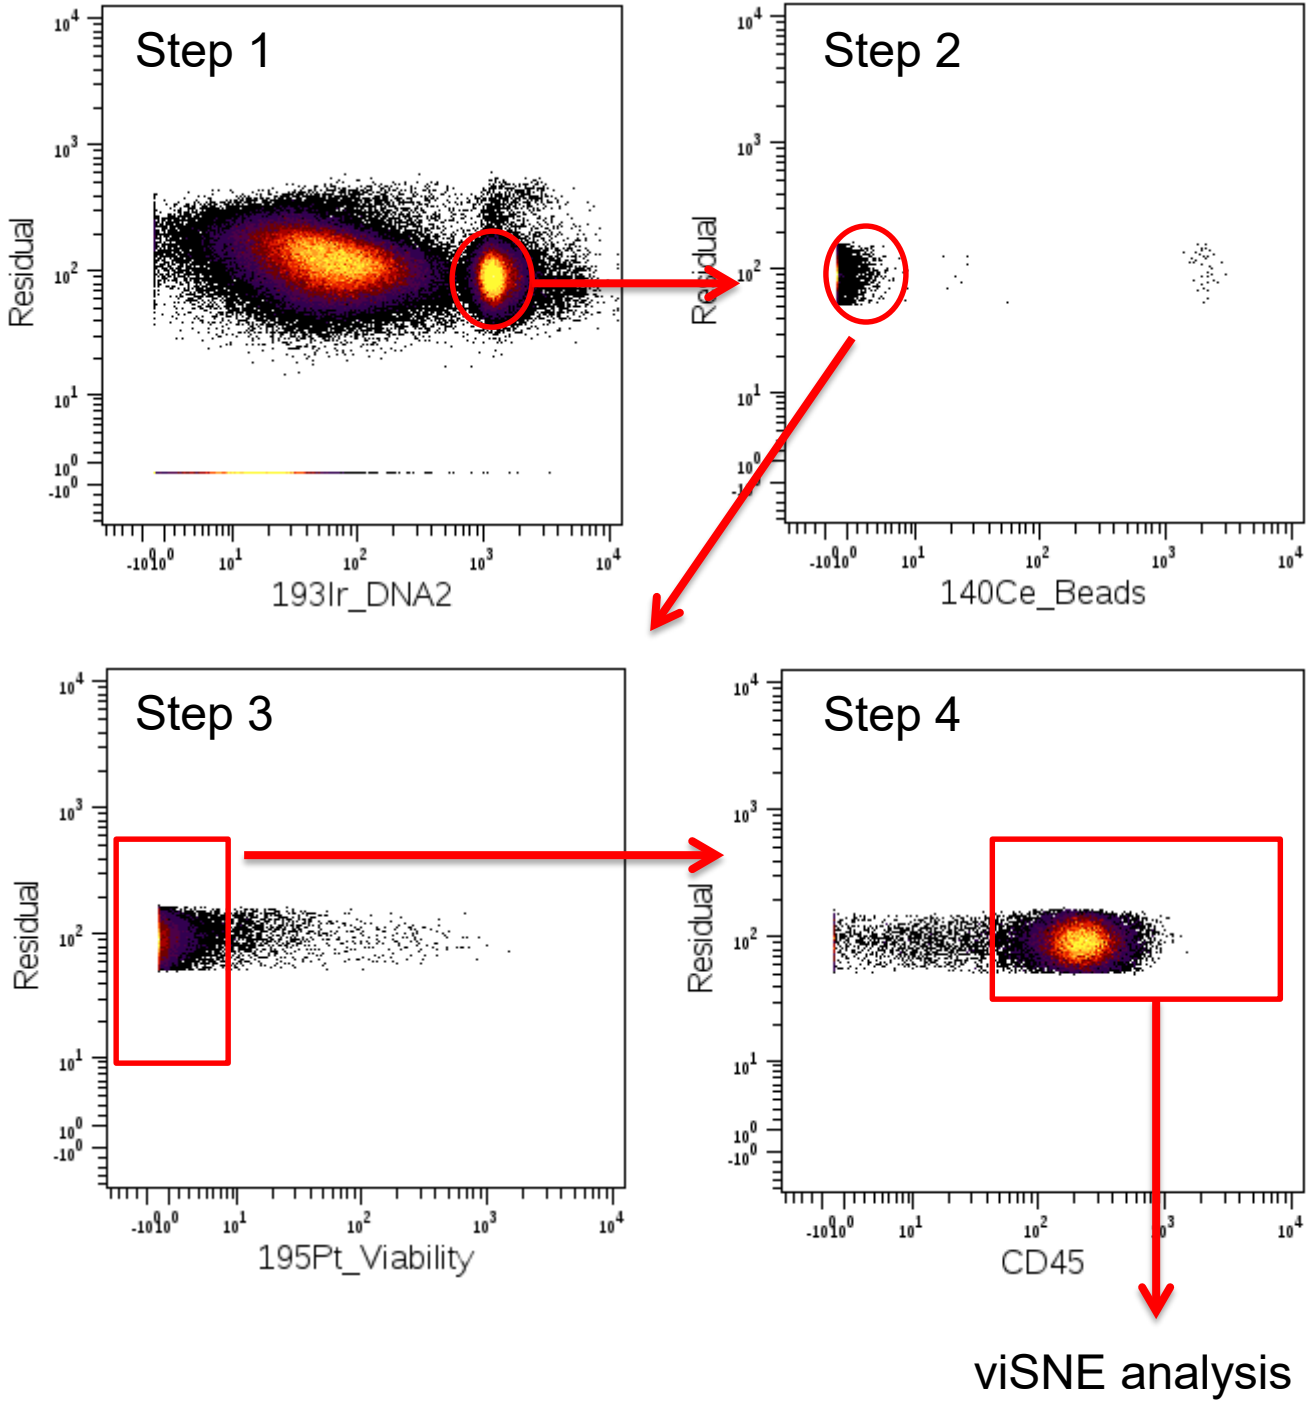

# Figure S3

Cluster 1  
Neutrophil

Manual gating

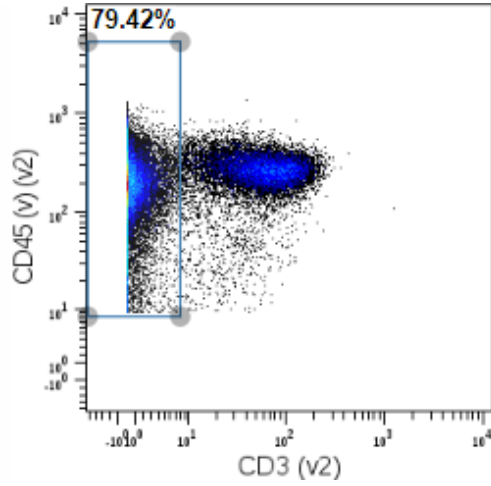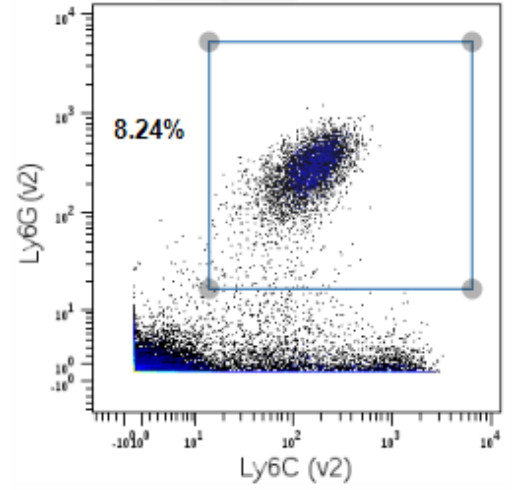

Overlay on viSNE

Sham\_Ungated\_visNE.fcs - Sham\_Ungated\_visNE.fcs

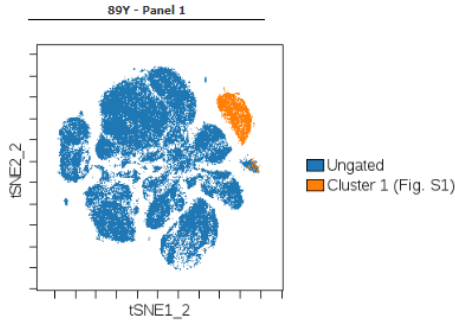

O2 injury\_Ungated\_visNE.fcs - O2 injury\_Ungated\_visNE.fcs

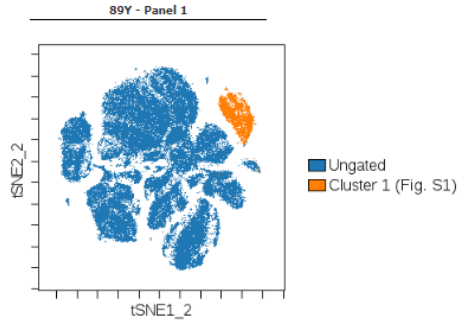

Expression of lineage markers

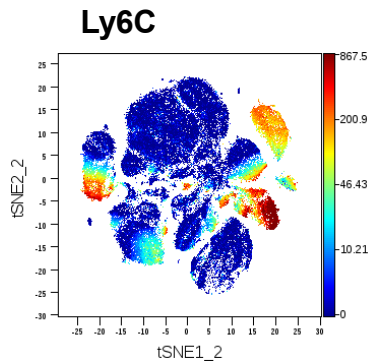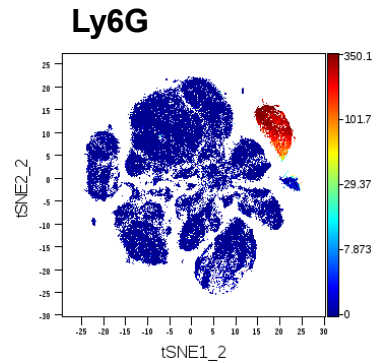

**Cluster 2**  
**Myeloid regulatory cell**

Manual gating

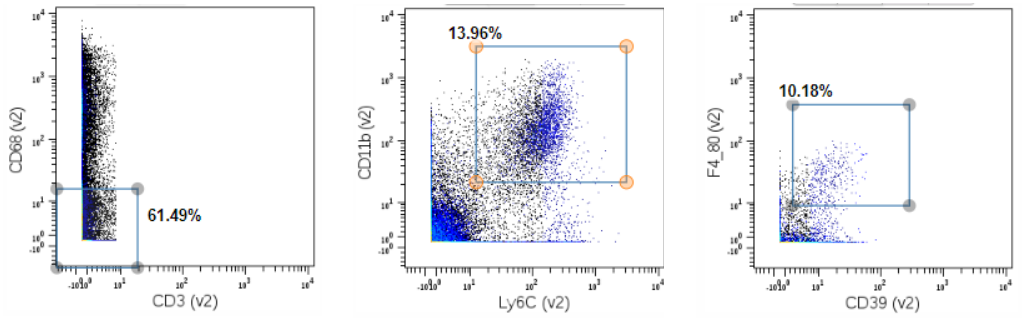

Overlay on viSNE

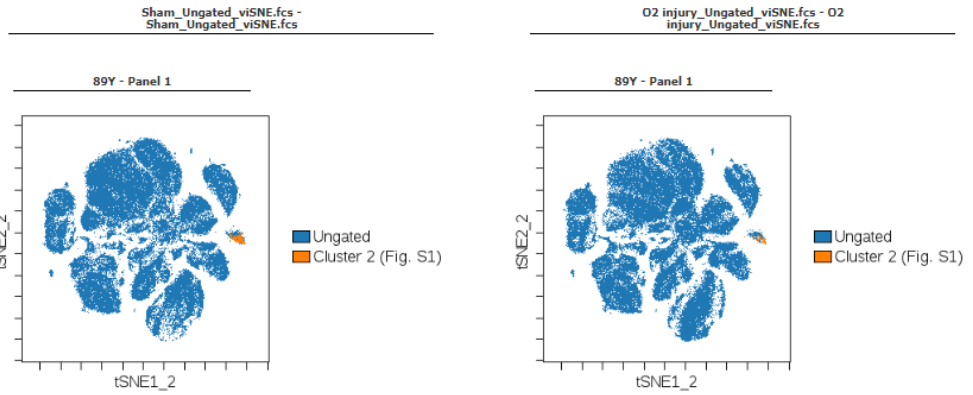

Expression of lineage markers

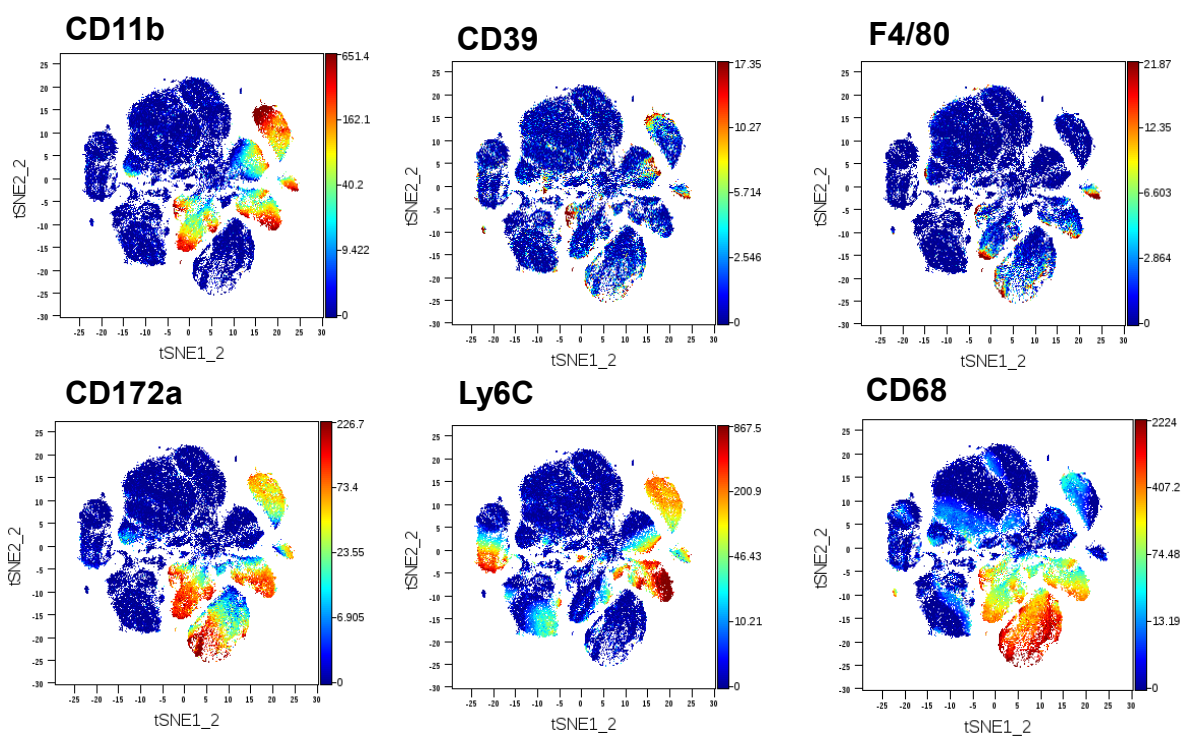

# Cluster 3 Monocyte

## Manual gating

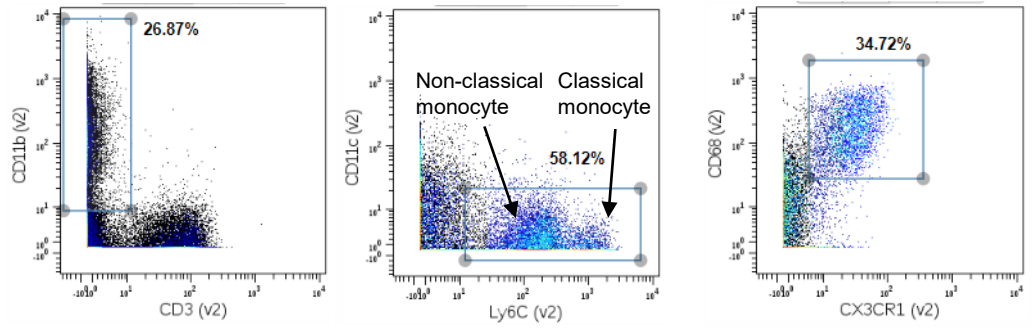

## Overlay on viSNE

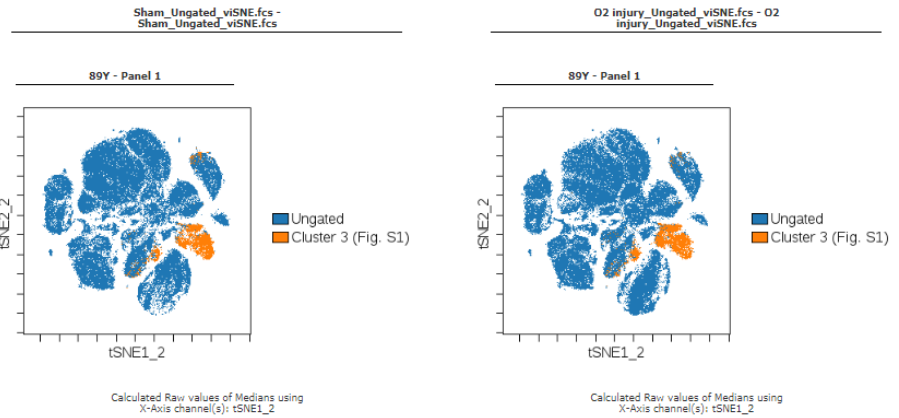

## Expression of lineage markers

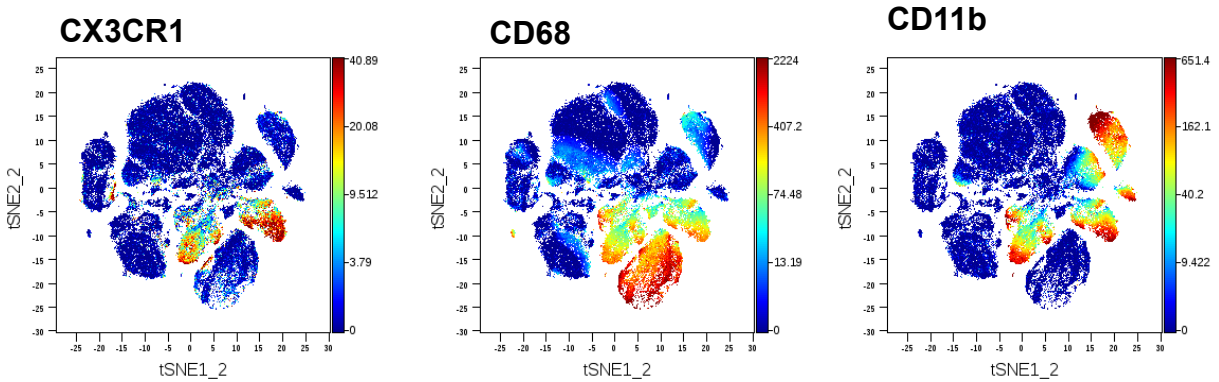

**Cluster 4**  
**Alveolar macrophage**

Manual gating

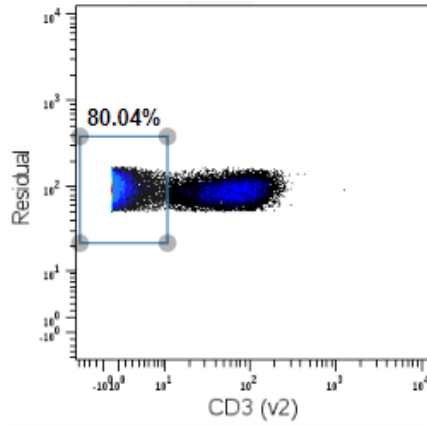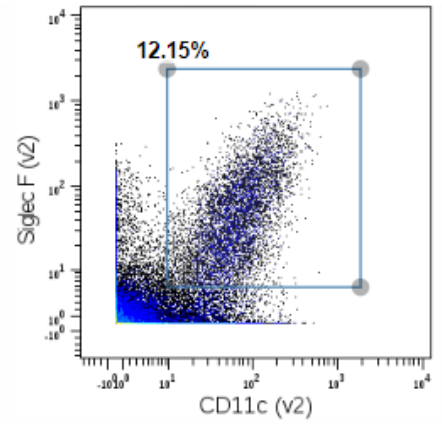

Overlay on viSNE

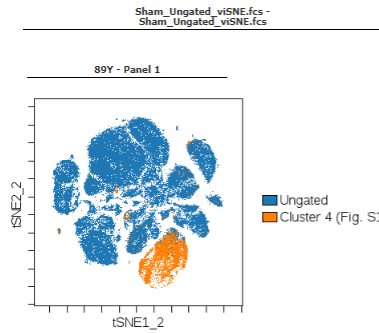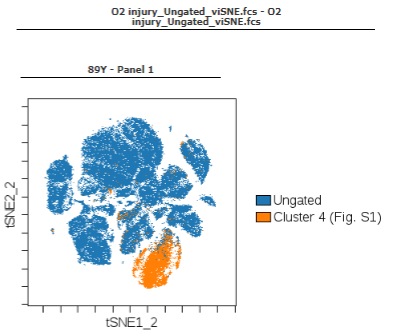

Expression of lineage markers

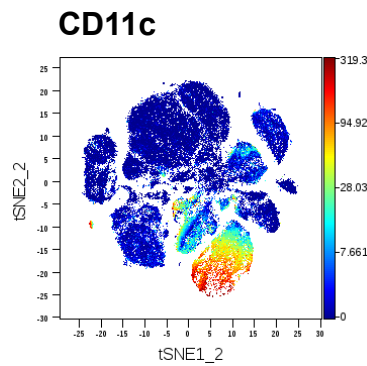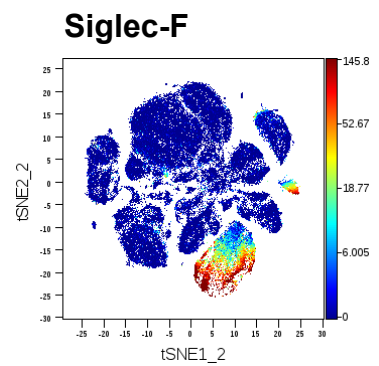

**Cluster 5**  
**Interstitial macrophage**

Manual gating

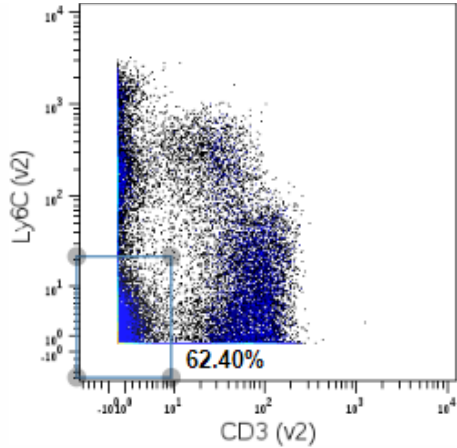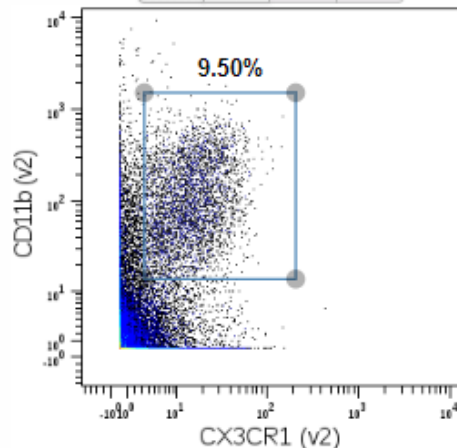

Overlay on viSNE

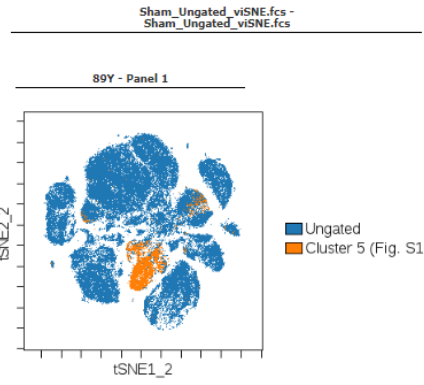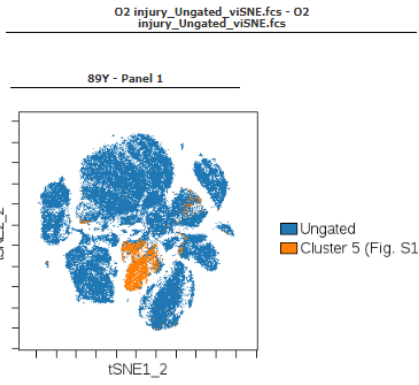

Expression of lineage markers

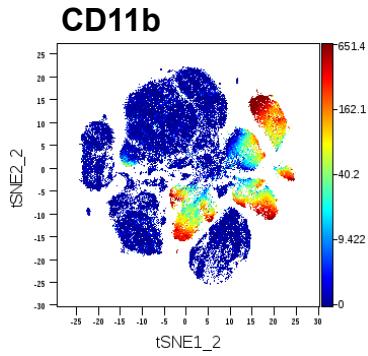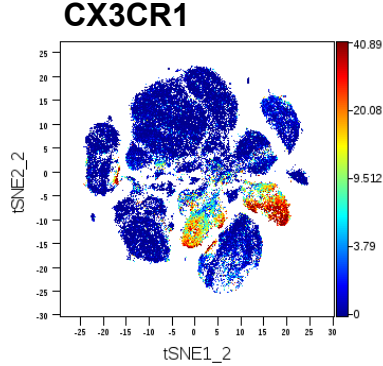



**Cluster 6**  
**CD4+ T cell**

Manual gating

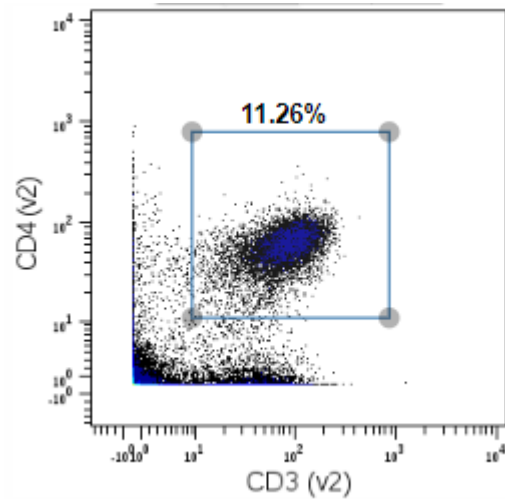

Overlay on viSNE

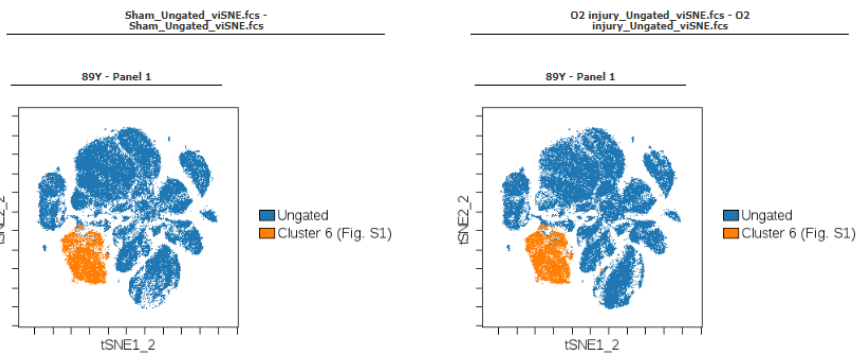

Expression of lineage markers

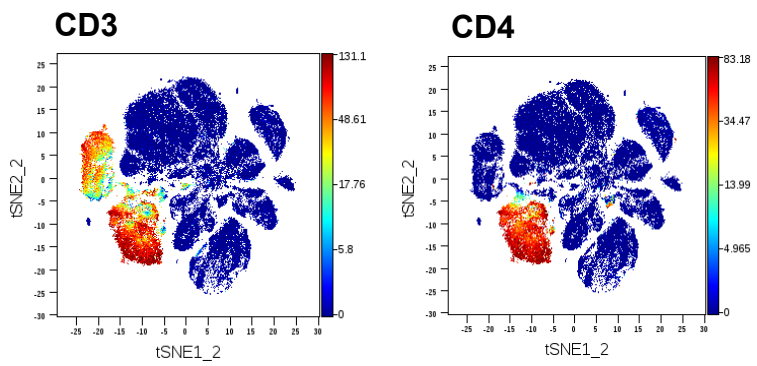

**Cluster 7**  
**CD8+ T cell**

Manual gating

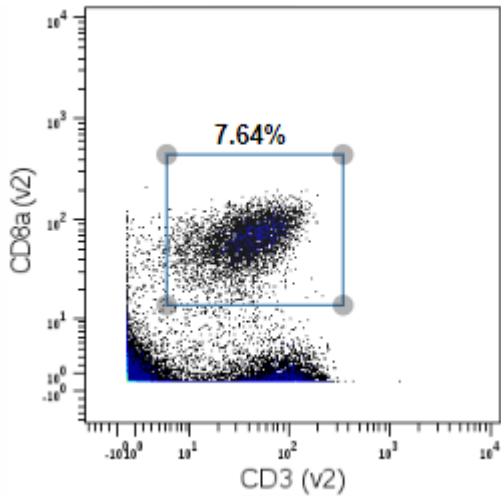

Overlay on viSNE

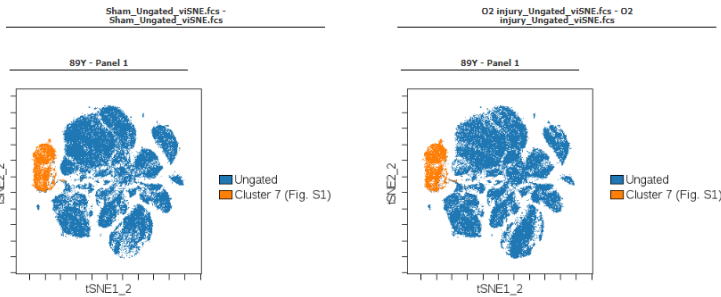

Expression of lineage markers

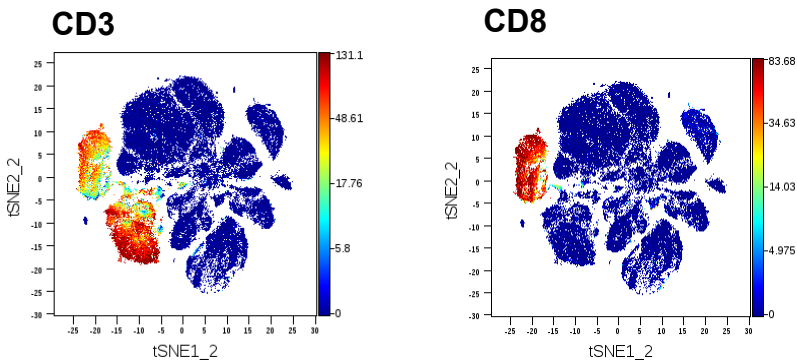

Cluster 8  
B cell

Manual gating

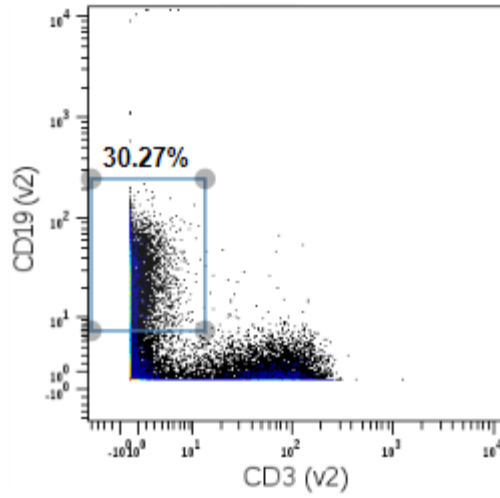

Overlay on viSNE

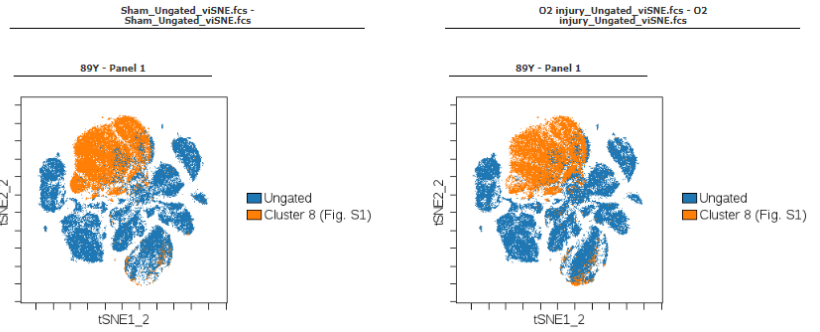

Expression of lineage markers

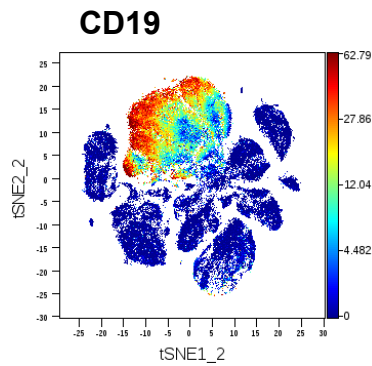

**Cluster 9  
NK cell**

Manual gating

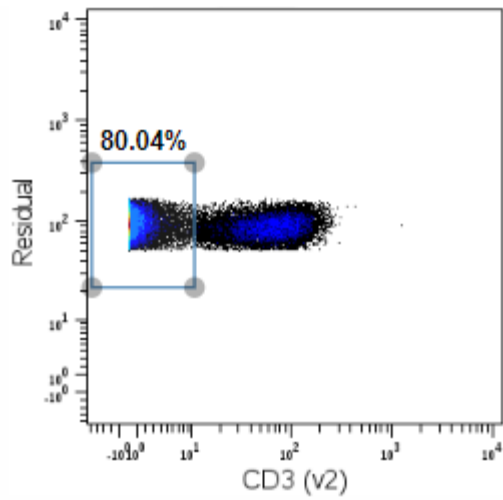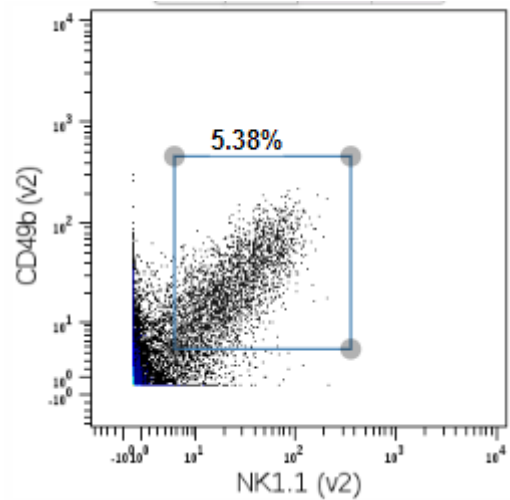

Overlay on viSNE

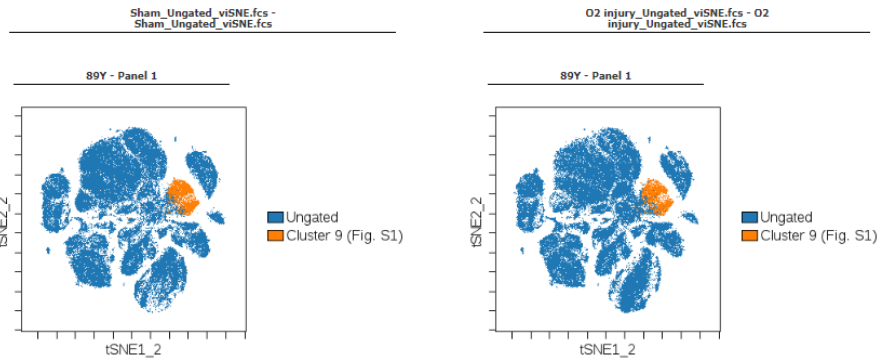

Expression of lineage markers

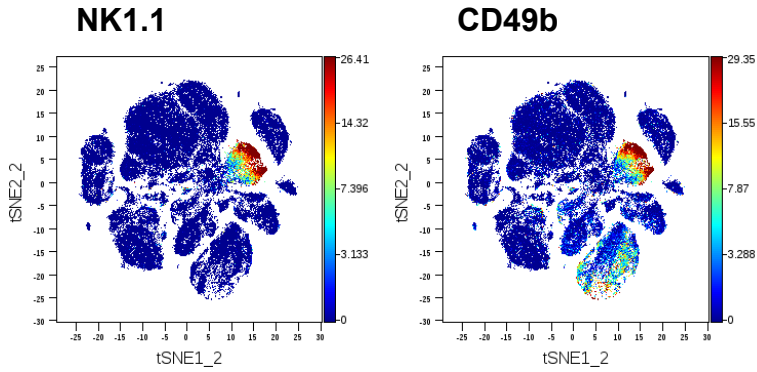

# Figure S4

**Cluster 1**  
 Alveolar macrophage  
 CD68+ Siglec-F+  
 MHC low

**Cluster 2**  
 Alveolar macrophage  
 CD68+ Siglec-F+  
 MHC intermediate

**Cluster 3**  
 Myeloid cell  
 CD68+ Siglec-F-  
 MHC high

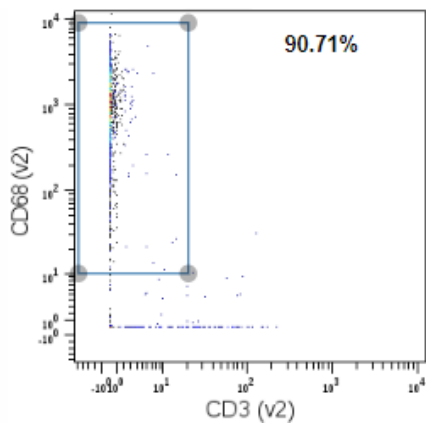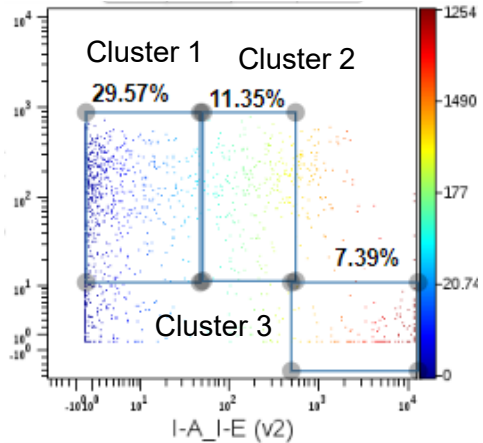

## Overlay on viSNE

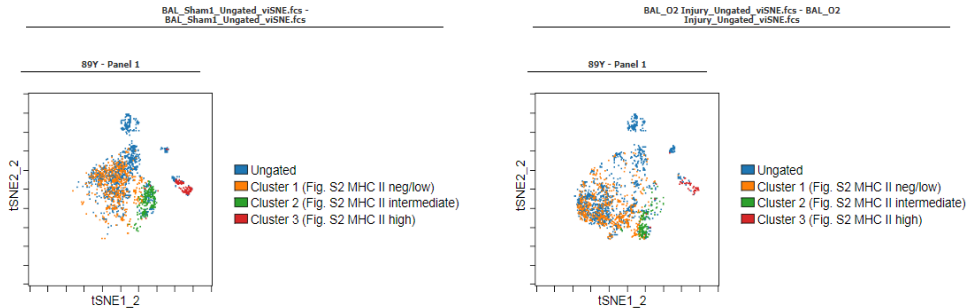

## Expression of lineage markers

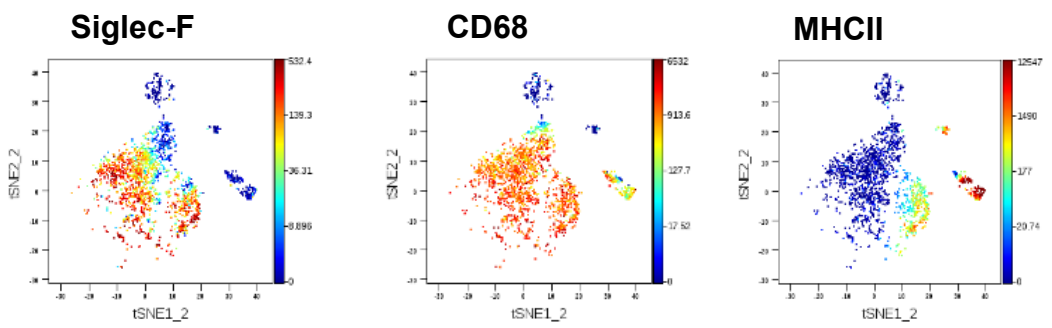

# Manual gating

**Cluster 4**  
B cell  
CD19+

**Cluster 5**  
T cell  
CD3+

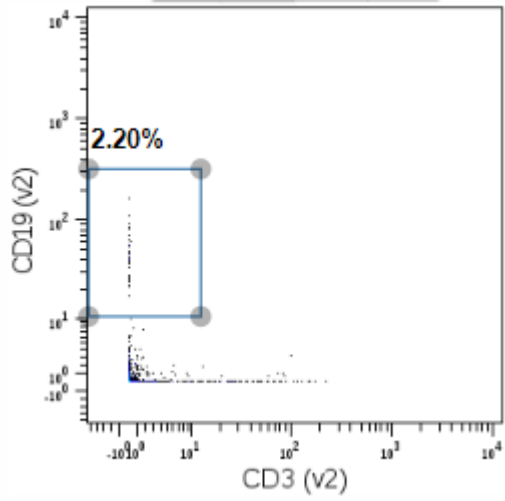

# Overlay on viSNE

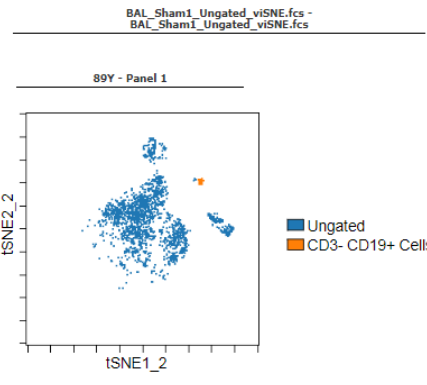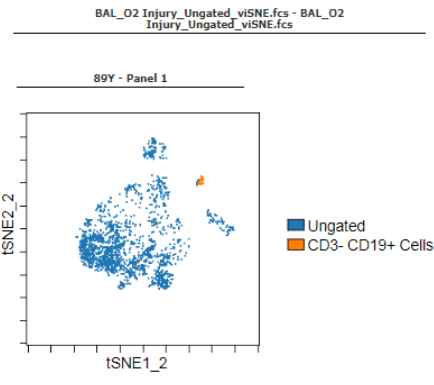

# Expression of lineage markers

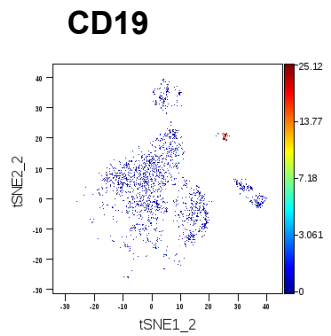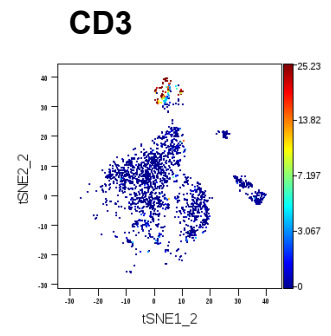

Figure S5

### EXPERIMENT 1 (N=7)

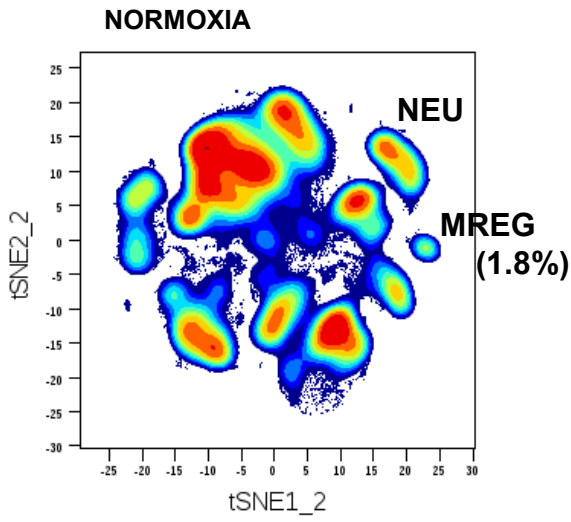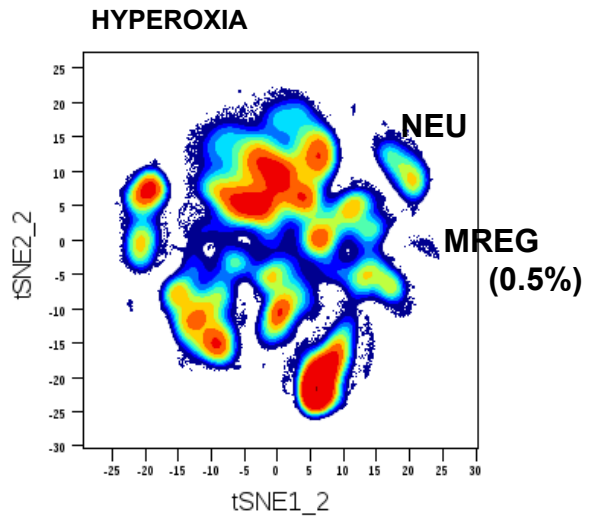

### EXPERIMENT 2 (N=5)

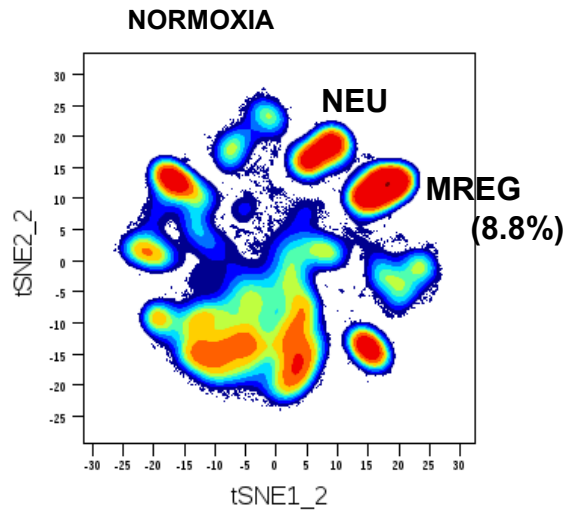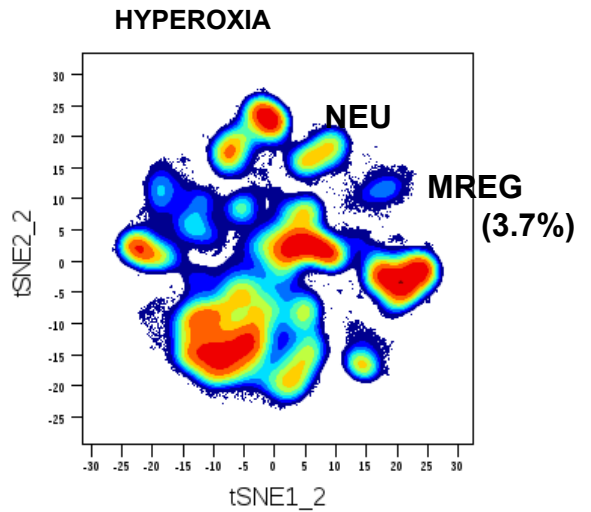

Figure S6

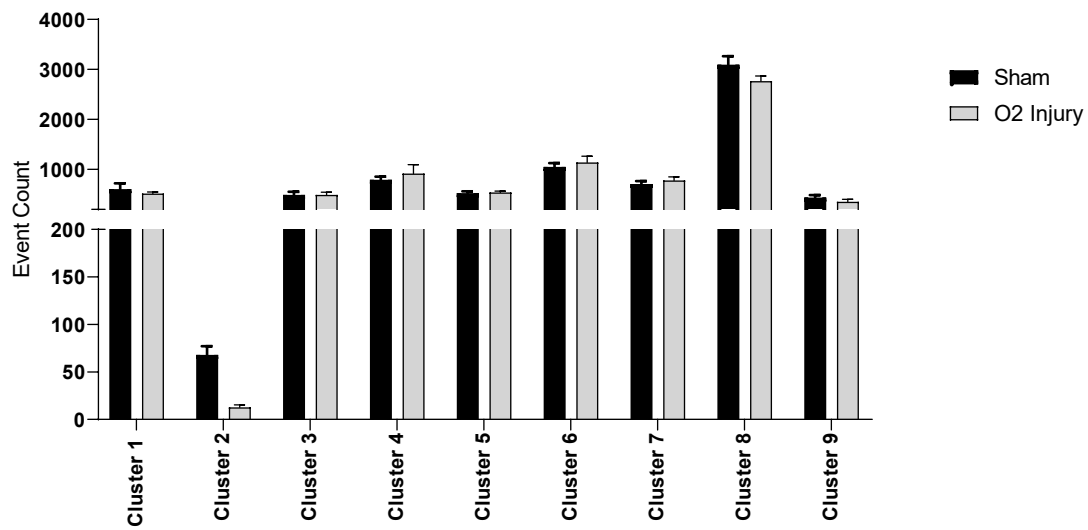

|           |                          |
|-----------|--------------------------|
| Cluster 1 | neutrophils              |
| Cluster 2 | myeloid regulatory cells |
| Cluster 3 | monocytes                |
| Cluster 4 | alveolar macrophages     |
| Cluster 5 | interstitial macrophages |
| Cluster 6 | CD4+ T cells             |
| Cluster 7 | CD8+ T cells             |
| Cluster 8 | B cells                  |
| Cluster 9 | NK cells                 |



Figure S7

### EXPERIMENT 1 (N=7)

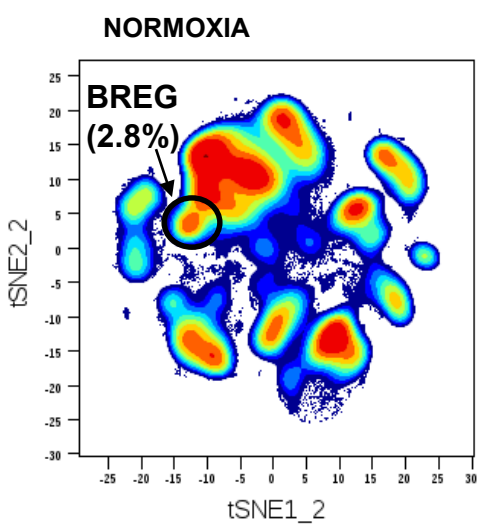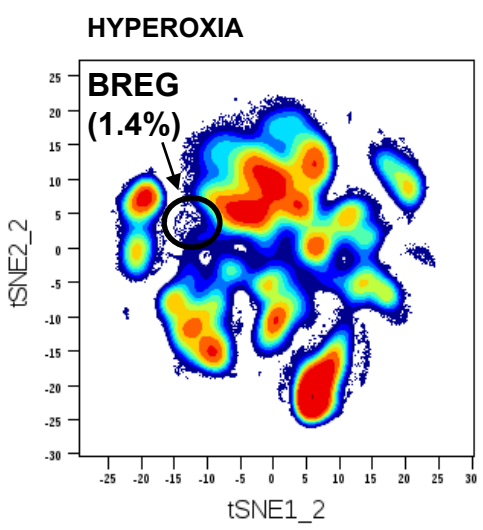

### EXPERIMENT 2 (N=5)

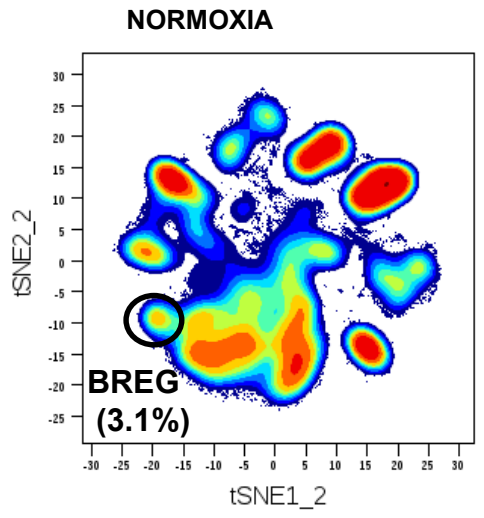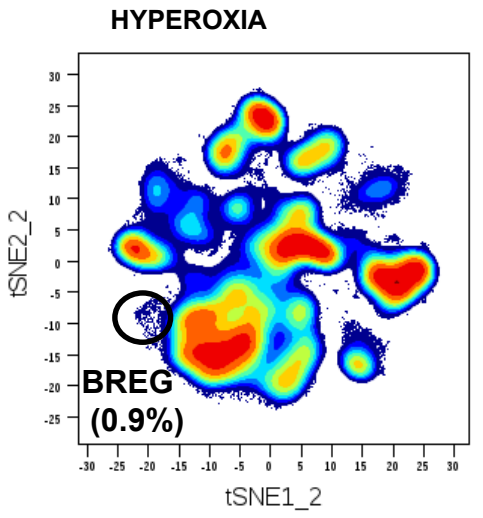

**Figure S8**

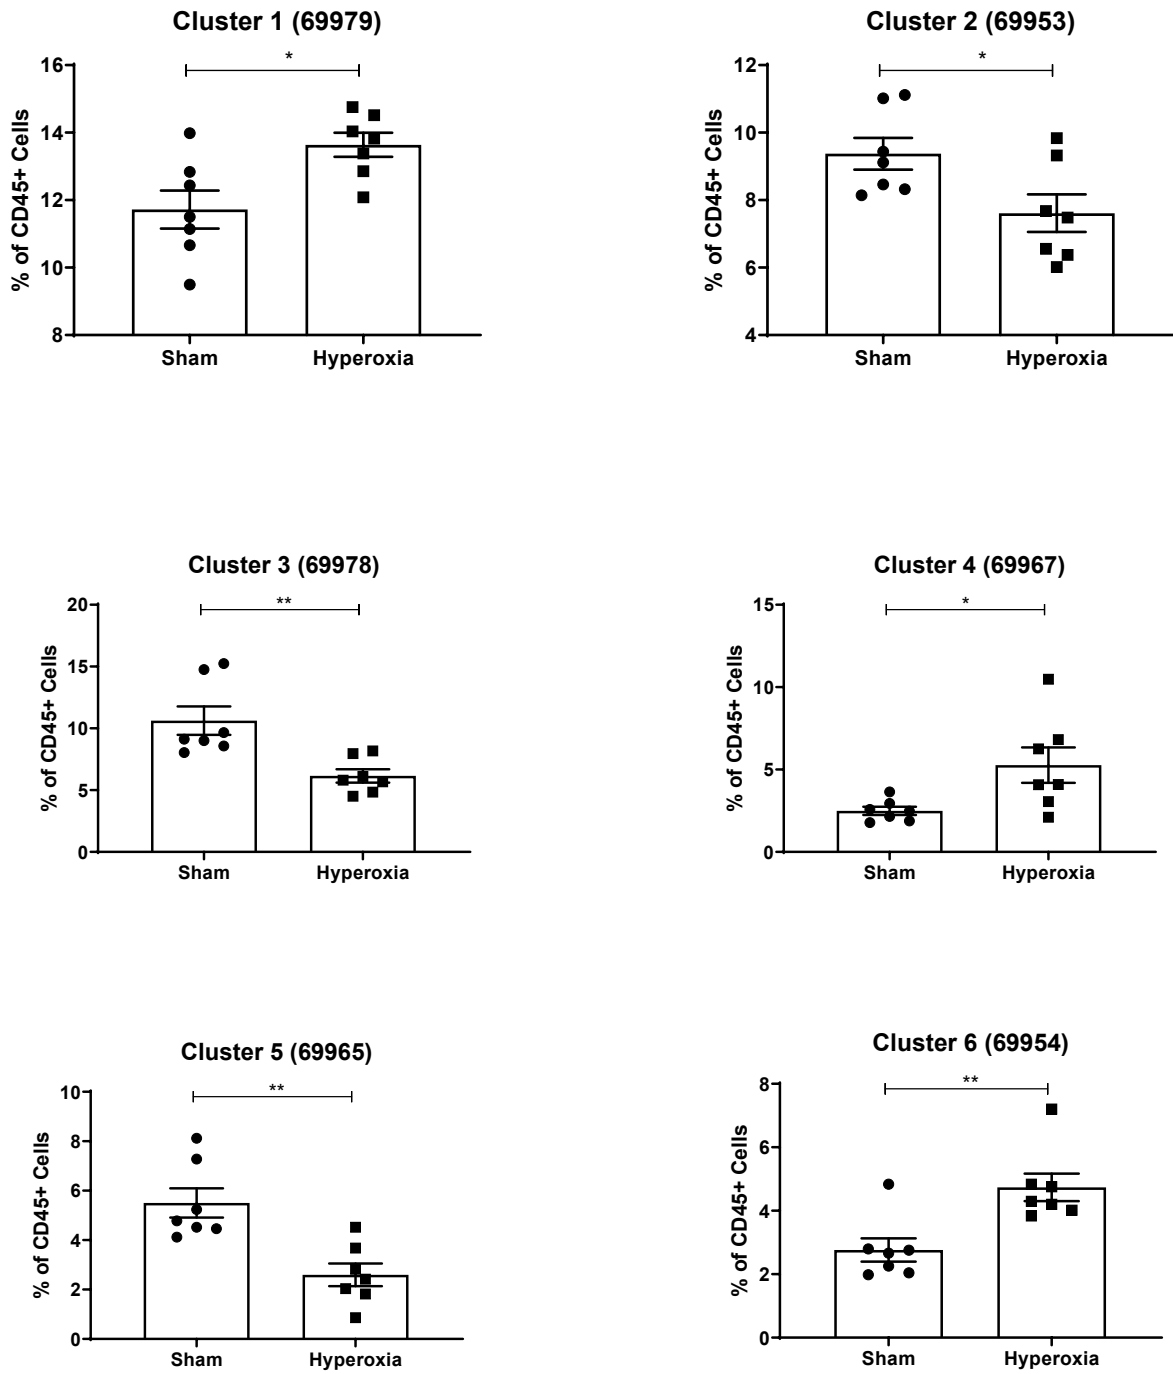

**Table S1**

| Marker     | Clone       | Metal |
|------------|-------------|-------|
| EpCAM      | G8.8        | 113In |
| CD44       | IM7         | 115In |
| CD45       | 30-F11      | 141Pr |
| CD8a       | 53-6.7      | 142Nd |
| CD73       | TY/11.8     | 143Nd |
| VEGF R1    | 141522      | 144Nd |
| CD4        | RM4-5       | 145Nd |
| CD11c      | N418        | 146Nd |
| Ly6G       | 1A8         | 148Nd |
| PD-L1      | 10F.9G2     | 149Sm |
| CX3CR1     | SA011F11    | 150Nd |
| Ly6C       | HK1.4       | 151Eu |
| CD3        | 145-2C11    | 152Sm |
| CD172a     | P84         | 153Eu |
| CD103      | 2E7         | 154Sm |
| CD68       | FA-11       | 155Gd |
| CD19       | 6D5         | 156Gd |
| CD205      | NLDC-145    | 158Gd |
| C39        | Duha59      | 159Tb |
| Sca-1      | E13-161.7   | 160Gd |
| Arginase I | Poly        | 161Dy |
| Foxp3      | FJK-16s     | 162Dy |
| NK1.1      | PK136       | 163Dy |
| Ki67       | 16A8        | 164Dy |
| CD115      | 460615      | 165Ho |
| CD86       | GL-1        | 166Er |
| Grz B      | GB11        | 167Er |
| CD11b      | M1/70       | 169Tm |
| Siglec-F   | E50-2440    | 170Er |
| CD49b      | DX5         | 171Yb |
| TCRgd      | GL3         | 172Yb |
| CD69       | H1.2F3      | 173Yb |
| I-A/I-E    | M5/114.15.2 | 174Yb |
| F4/80      | BM8         | 175Lu |
| TLR2       | T2.5        | 176Yb |
| Autotaxin  | Polyclonal  | 209Bi |

**Figure S1.** Lung tissue during normoxia and hyperoxia. Lung parenchyma from WT mouse during normoxia and after 48 hours of hyperoxia. Representative sample, H&E staining, 400x magnified. No evidence of diffuse alveolar damage is seen at 48 hours.

**Figure S2.** Stepwise gating approach to identify live CD45+ immune cells for CyTOF analysis. Step 1: Single cells were gated based on DNA content (193Ir-DNA2+). Step 2: Elimination of normalization beads. Step 3: Gating on live cells. Step 4: Gating on CD45+ cells.

**Figure S3.** Identification of immune cell lineage of cell clusters in the whole lung based on the expression of surface and intracellular markers. Overlays of manually gated populations on tSNE plots.

**Figure S4.** Identification of immune cell lineage of cell clusters in BALF based on the expression of surface and intracellular markers. Overlays of manually gated populations on tSNE plots.

**Figure S5.** Myeloid regulatory cells during normoxia and hyperoxia. tSNE plots from 2 independent experiments (N=7 and N=5) show depletion of myeloid regulatory cells during hyperoxia.

**Figure S6.** Absolute cell numbers of 9 major immune clusters as acquired by CyTOF in the live gate before equal sampling (7 control mice and 7 mice in hyperoxia).

**Figure S7.** Regulatory B cells during normoxia and hyperoxia. tSNE plots from 2 independent experiments (N=7 and N= 5) show depletion of regulatory B cells during hyperoxia.

**Figure S8.** Comparison of frequencies of CITRUS-identified clusters during normoxia and hyperoxia with unpaired t-test . Each dot represents data from one lung. \* indicated  $p < 0.05$ , \*\* indicated  $p < 0.01$ .

**Table S1.** Panel of CyTOF antibodies used in the study. 36 metal conjugated antibodies were used in the study.
